# Supplementary material for: NIR squaraine dyes for dual colorimetric and fluorescent determination of Fe3+, Cu2+, and Hg2+ ions
Source: Royal Society of Chemistry journal article supplement (doi:10.1039/d3ra02419a), 2023-01-01
Supplement: d3ra02419a1.pdf [file d3ra02419a1.pdf]

## Supporting Information

### NIR squaraine dyes for the dual colorimetric and fluorescent determination of Fe<sup>3+</sup>, Cu<sup>2+</sup> and Hg<sup>2+</sup> ions

Huifang Li<sup>1</sup>, Yiru Tang<sup>1</sup>, Kunrong Shen, Ji Lu, Zhijie Zhang, Dong Yi, Na Hao, Qiang Fu, Zi Ye,  
Jun Wei, Jun Wang, Xianchao Pan, Siping Wei\*, Lin Yang\*

Green Pharmaceutical Technology Key Laboratory of Luzhou City, Central Nervous System Drug  
Key Laboratory of Sichuan Province, School of Pharmacy, Southwest Medical University, Luzhou  
646000, PR China

\* Corresponding author. E-mail addresses: swei1225@swmu.edu.cn (Siping Wei),  
yanglinyjl@swmu.edu.cn (Lin Yang).

<sup>1</sup> These authors contributed equally.

### Contents

**Table S1.** Summary of organic materials-based colorimetric and fluorimetric sensors for metal ions detection.

**Figure S1.** UV-vis absorption spectra and fluorescence emission spectra of **BBSQ** (10 μM) with different solvents.

**Figure S2.** UV-vis absorption spectra and fluorescence emission spectra of **BBSQ** (DMSO, 10 μM) with different metal ions (20 equiv.).

**Figure S3.** UV-vis absorption spectra and fluorescence emission spectra of **BBSQ** (MeOH, 10 μM) with different metal ions (20 equiv.).

**Figure S4.** UV-vis absorption spectra and fluorescence emission spectra of **BBSQ** (CH<sub>3</sub>CN, 10 μM) with different metal ions (20 equiv.).

**Figure S5.** UV-vis absorption spectra of **BBSQ** (CH<sub>3</sub>CN) with different concentration.

**Figure S6.** UV-vis absorption spectra and fluorescence emission spectra of **BBSQ-S** (CH<sub>3</sub>CN, 10 μM) with different metal ions (20 equiv.).

**Figure S7.** UV-vis absorption spectra and fluorescence emission spectra of **BBSQ-SS** (CH<sub>3</sub>CN,

---

10  $\mu\text{M}$ ) with different metal ions (20 equiv.).

**Figure S8.** UV-vis absorption spectra and fluorescence emission spectra of **BBSQ-NEt** ( $\text{CH}_3\text{CN}$ , 10  $\mu\text{M}$ ) with different metal ions (20 equiv.).

**Figure S9.** UV-vis absorption spectra and fluorescence emission spectra of **BBSQ** (10  $\mu\text{M}$ ) in presence of  $\text{Fe}^{3+}$  (20 equiv.) along with other metal ions (20 equiv.).

**Figure S10.** UV-vis absorption spectra and fluorescence emission spectra of **BBSQ** (10  $\mu\text{M}$ ) in presence of  $\text{Cu}^{2+}$  (20 equiv.) along with other metal ions (20 equiv.).

**Figure S11.** UV-vis absorption spectra and fluorescence emission spectra of **BBSQ** (10  $\mu\text{M}$ ) in presence of  $\text{Hg}^{2+}$  (20 equiv.) along with other metal ions (20 equiv.).

**Figure S12.** UV-vis absorption and fluorescence spectral titrations of **BBSQ** acetonitrile solution (10  $\mu\text{M}$ ) with  $\text{Cu}^{2+}$  (0-40  $\mu\text{M}$ ).

**Figure S13.** UV-vis absorption and fluorescence spectral titrations of **BBSQ** acetonitrile solution (10  $\mu\text{M}$ ) with  $\text{Hg}^{2+}$  (0-40  $\mu\text{M}$ ).

**Figure S14.** Fluorescence emission spectra of **BBSQ** and **BBSQ** in response to  $\text{Fe}^{3+}$ ,  $\text{Cu}^{2+}$  and  $\text{Hg}^{2+}$  ions with/ without adding EDTA.

**Figure S15 ~ S23.**  $^1\text{H}$  NMR,  $^{13}\text{C}$  NMR and  $^{19}\text{F}$  NMR spectra of **BBSQ**, **BBSQ-S**, **BBSQ-SS**, **BBSQ-NEt** ( $^{19}\text{F}$  NMR) in  $\text{CDCl}_3$ .

**Figure S24 ~ S30.** HRMS spectra of **BBSQ**, **BBSQ-S**, **BBSQ-SS**, **BBSQ-NEt**, **BBSQ-Fe<sup>3+</sup>**, **BBSQ-Cu<sup>2+</sup>**, **BBSQ-Hg<sup>2+</sup>**.

Table S1 Summary of organic materials-based colorimetric and fluorimetric sensors for metal ions detection.

| Sensor No. | Sensing ions                                             | $\lambda_{ex}/\lambda_{em}$ [nm] | LOD                                                                     | Response time     | Core Structure             | Sensor type                                 | Ref.         |
|------------|----------------------------------------------------------|----------------------------------|-------------------------------------------------------------------------|-------------------|----------------------------|---------------------------------------------|--------------|
| 1          | Fe <sup>3+</sup>                                         | 520/582                          | 41 nM                                                                   | 10 min            | Rhodamine                  | Turn-on                                     | 1            |
| 2          | Fe <sup>3+</sup>                                         | 390/440                          | 75 nM                                                                   | 1 min             | Pyrene                     | Turn-on                                     | 2            |
| 3          | Fe <sup>3+</sup> ,<br>Hg <sup>2+</sup>                   | 384/438                          | 98 nM<br>27.2 nM                                                        | -                 | Rhodamine<br>naphthalimide | Turn-on                                     | 3            |
| 4          | Fe <sup>3+</sup>                                         | 448/488 ,561                     | 4.3 $\mu$ M                                                             | 2 min             | Coumarin                   | Turn-on                                     | 4            |
| 5          | Fe <sup>3+</sup>                                         | 530/551                          | 9.2 nM                                                                  | 6 min             | Rhodamine                  | On-off<br>Turn-off                          | 5            |
| 6          | Cu <sup>2+</sup>                                         | 420/408                          | 10 $\mu$ M                                                              | -                 | Naphthol                   | Colorimetric<br>response<br>Turn-on 25-fold | 6            |
| 7          | Cu <sup>2+</sup>                                         | 680/700                          | 29 nM                                                                   | 15 min            | 2-picolinic ester          | fluorescence<br>enhancement                 | 7            |
| 8          | Cu <sup>2+</sup>                                         | 435/532                          | 52 $\mu$ M                                                              | 60 min            | Naphthalene<br>imide       | Turn-on                                     | 8            |
| 9          | Cu <sup>2+</sup>                                         | 426/590                          | 0.2 $\mu$ M                                                             | 20 min            | Rhodamine                  | Turn-on                                     | 9            |
| 10         | Cu <sup>2+</sup>                                         | 510/596                          | 42.3 nM                                                                 | 3 min             | Coumarin                   | Turn-on                                     | 10           |
| 11         | Hg <sup>2+</sup>                                         | 530/580                          | 1 ppb                                                                   | 5 min             | Rhodamine B                | On-off                                      | 11           |
| 12         | Hg <sup>2+</sup>                                         | 540/575                          | 70 nM                                                                   | 30 min            | Schiff-base                | Turn-on                                     | 12           |
| 13         | Hg <sup>2+</sup>                                         | 530/582                          | 0.18 $\mu$ M                                                            | 5 s               | Rhodamine                  | Turn-on                                     | 13           |
| 14         | Hg <sup>2+</sup>                                         | 370/420<br>370/530               | 49 nM                                                                   | 150 min<br>50 min | 8-amino<br>BODIPY          | Turn-on                                     | 14           |
| 15         | Fe <sup>3+</sup><br>Cu <sup>2+</sup><br>Hg <sup>2+</sup> | 663/686                          | Fe <sup>3+</sup> :14.17<br>$\mu$ M<br>Cu <sup>2+</sup> :6.06<br>$\mu$ M | A few<br>seconds  | Squaraine                  | Turn-off                                    | This<br>work |

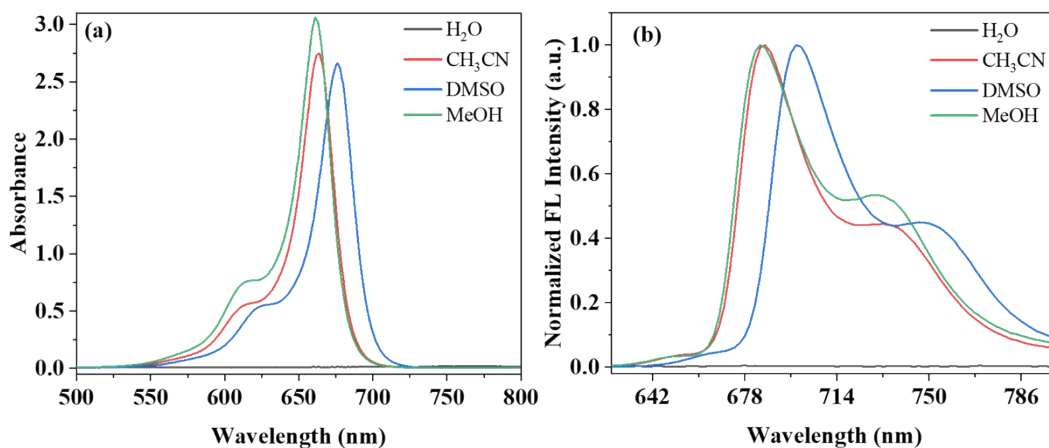

Figure S1 (a) UV-vis absorption spectra and (b) fluorescence emission spectra of BBSQ (10  $\mu$ M) with different solvents.

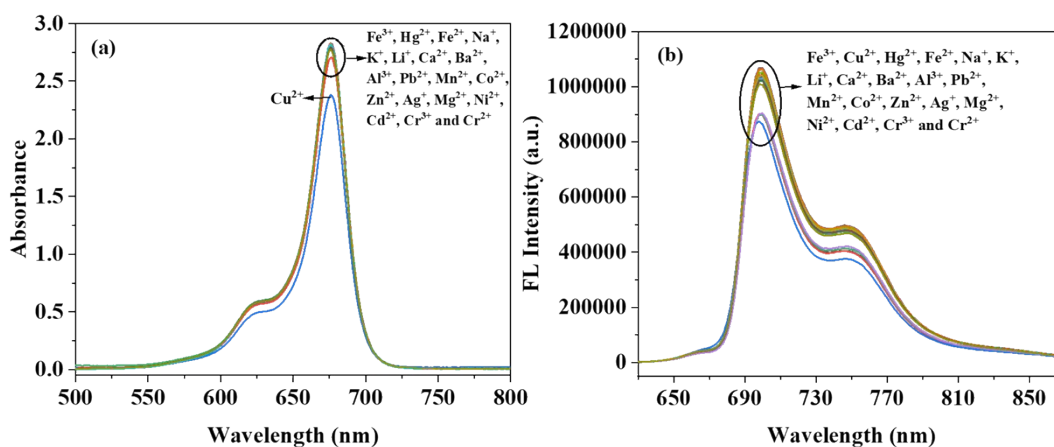

Figure S2 (a) UV-vis absorption spectra and (b) fluorescence emission spectra of BBSQ (DMSO, 10  $\mu$ M) with different metal ions (20 equiv.).

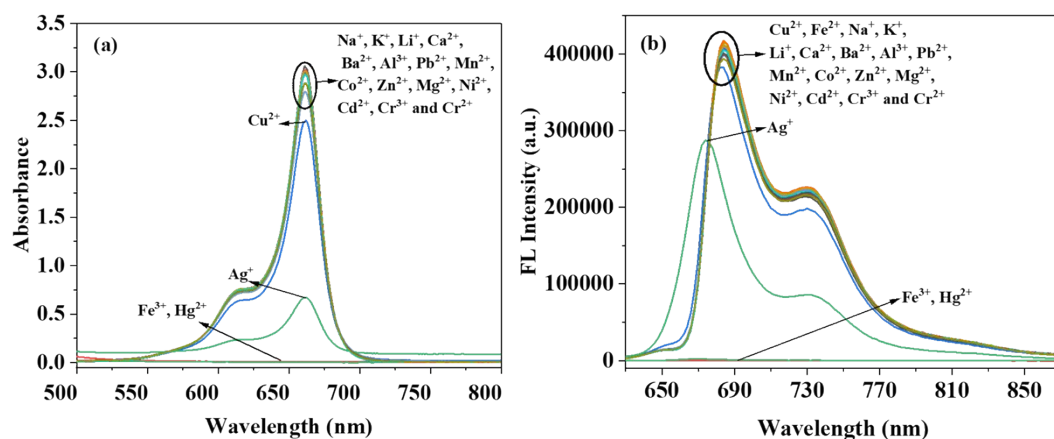

Figure S3 (a) UV-vis absorption spectra and (b) fluorescence emission spectra of BBSQ (MeOH, 10  $\mu$ M) with different metal ions (20 equiv.).

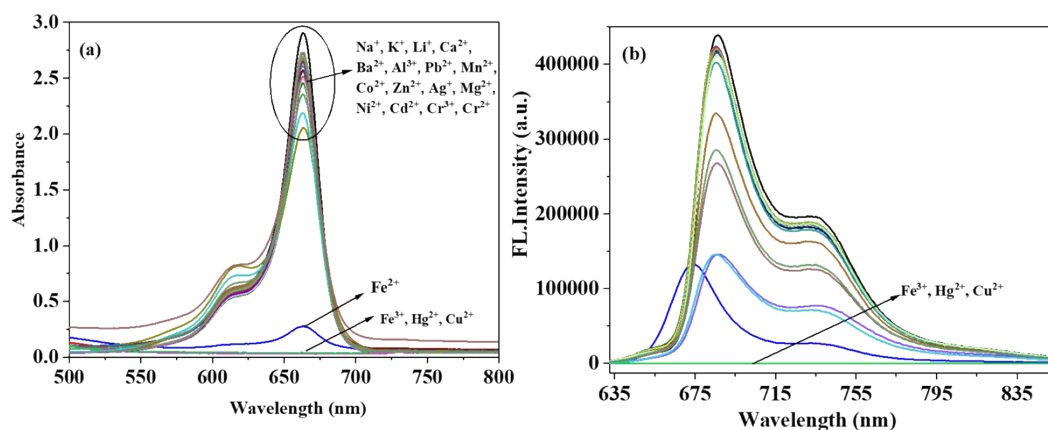

Figure S4 (a) UV-vis absorption spectra and (b) fluorescence emission spectra of BBSQ (CH<sub>3</sub>CN, 10 μM) with different metal ions (20 equiv.).

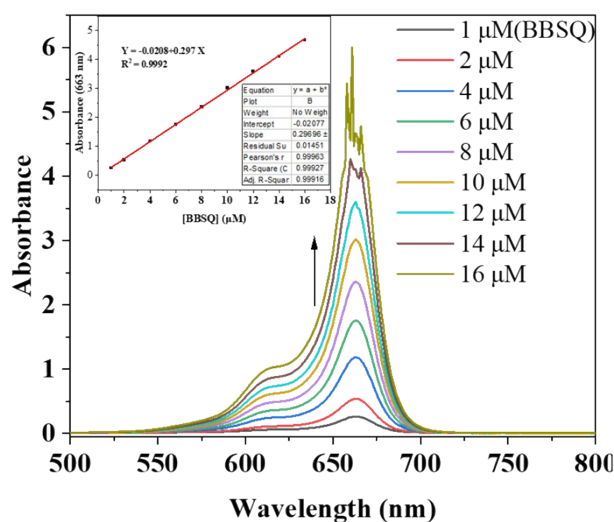

Figure S5 UV-vis absorption spectra of BBSQ (CH<sub>3</sub>CN) with different concentration; inset: the linear correlation curve of absorbance at 663 nm with increasing BBSQ concentration.

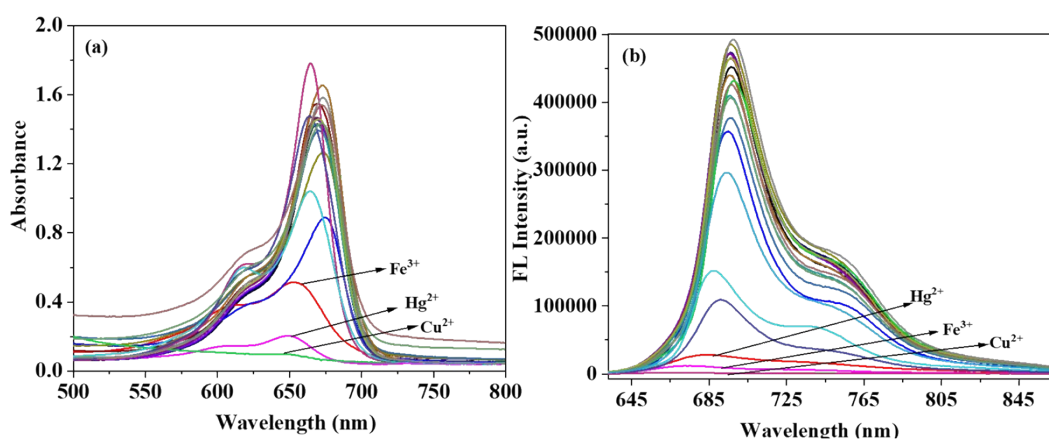

Figure S6 (a) UV-vis absorption spectra and (b) fluorescence emission spectra of BBSQ-S (CH<sub>3</sub>CN, 10 μM) with different metal ions (20 equiv.).

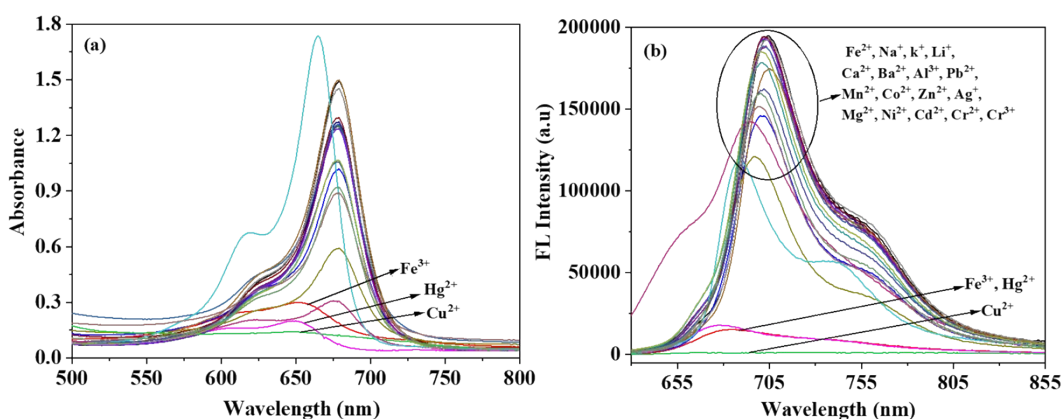

Figure S7 (a) UV-vis absorption spectra and (b) fluorescence emission spectra of BBSQ-SS ( $\text{CH}_3\text{CN}$ ,  $10 \mu\text{M}$ ) with different metal ions (20 equiv.).

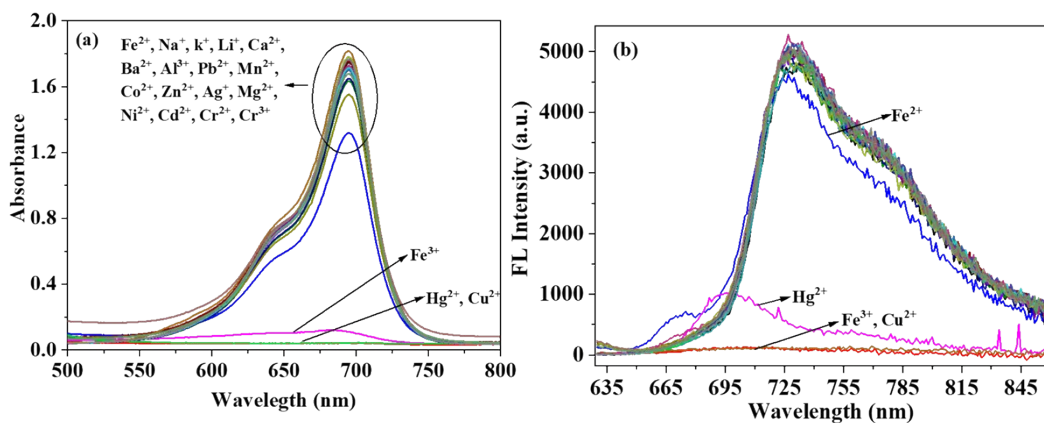

Figure S8 (a) UV-vis absorption spectra and (b) fluorescence emission spectra of BBSQ-NET ( $\text{CH}_3\text{CN}$ ,  $10 \mu\text{M}$ ) with different metal ions (20 equiv.).

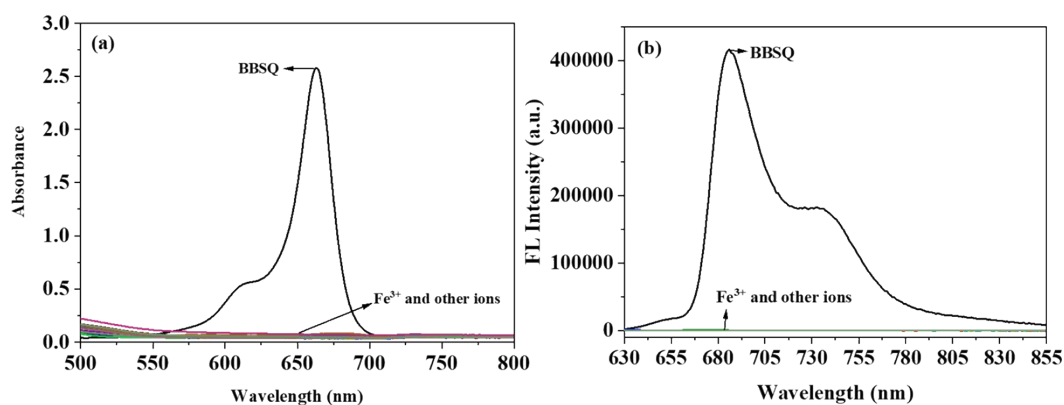

Figure S9 (a) UV-vis absorption spectra and (b) fluorescence emission spectra of BBSQ ( $10 \mu\text{M}$ ) in presence of  $\text{Fe}^{3+}$  (20 equiv.) along with other metal ions (20 equiv.).

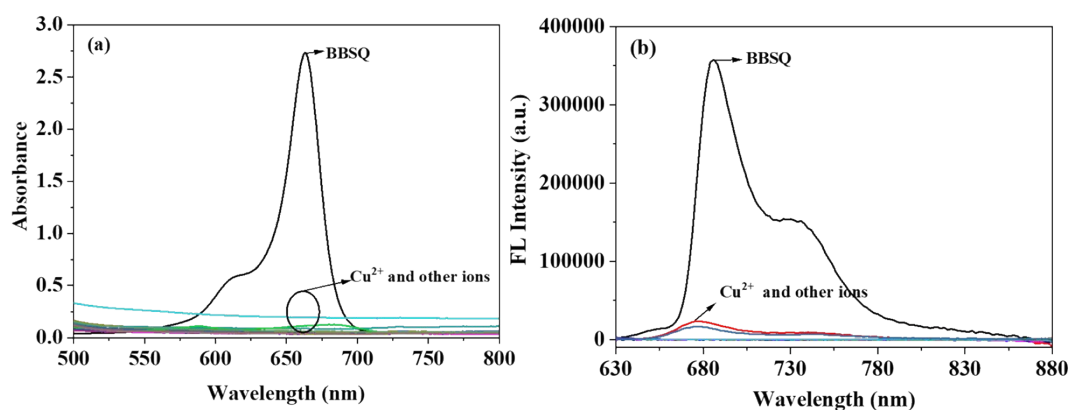

Figure S10 (a) UV-vis absorption spectra and (b) fluorescence emission spectra of BBSQ (10  $\mu\text{M}$ ) in presence of  $\text{Cu}^{2+}$  (20 equiv.) along with other metal ions (20 equiv.).

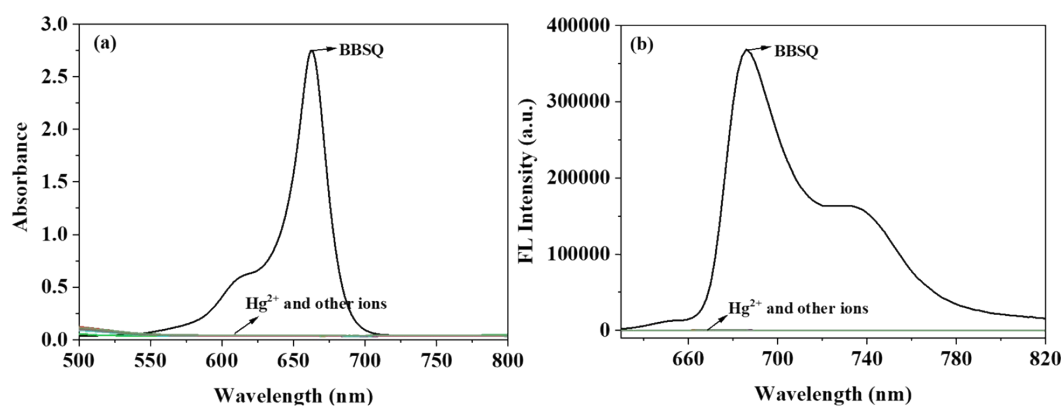

Figure S11 (a) UV-vis absorption spectra and (b) fluorescence emission spectra of BBSQ (10  $\mu\text{M}$ ) in presence of  $\text{Hg}^{2+}$  (20 equiv.) along with other metal ions (20 equiv.).

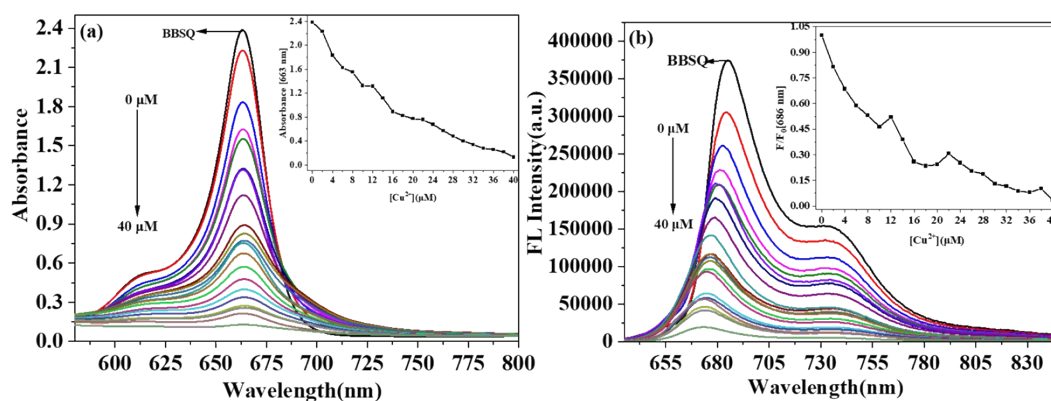

Figure S12 (a) UV-vis absorption and (b) fluorescence spectral titrations of BBSQ acetonitrile solution (10  $\mu\text{M}$ ) with  $\text{Cu}^{2+}$  (0-40  $\mu\text{M}$ ); inset: the concentration titration curves of absorbance at 663 nm (a) and fluorescence emission intensity at 686 nm (b) with increasing  $\text{Cu}^{2+}$  concentration.

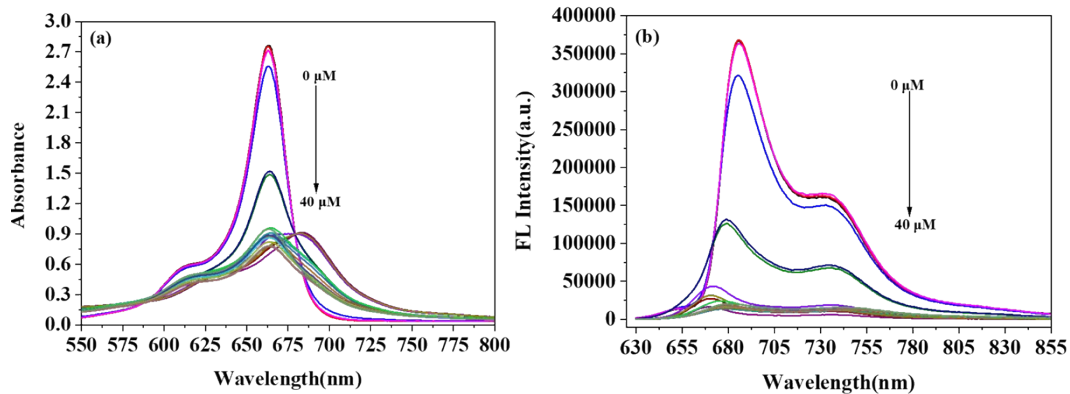

Figure S13 (a) UV-vis absorption and (b) fluorescence spectral titrations of BBSQ acetonitrile solution (10  $\mu\text{M}$ ) with  $\text{Hg}^{2+}$  (0-40  $\mu\text{M}$ ).

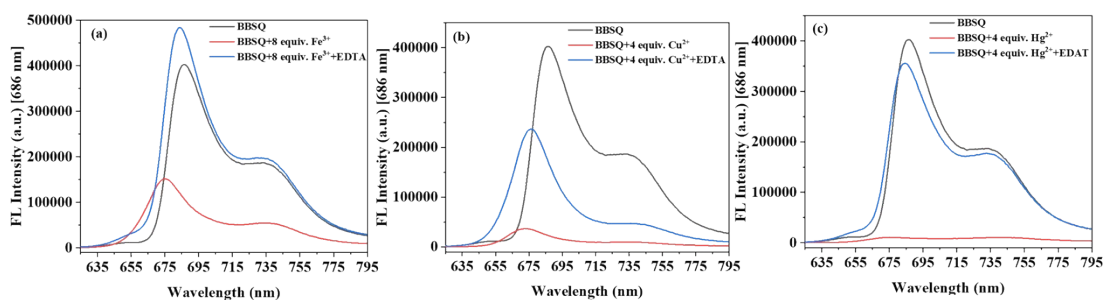

Figure S14 Fluorescence emission spectra of BBSQ and BBSQ in response to (a)  $\text{Fe}^{3+}$ , (b)  $\text{Cu}^{2+}$  and (c)  $\text{Hg}^{2+}$  ions with/ without adding EDTA.

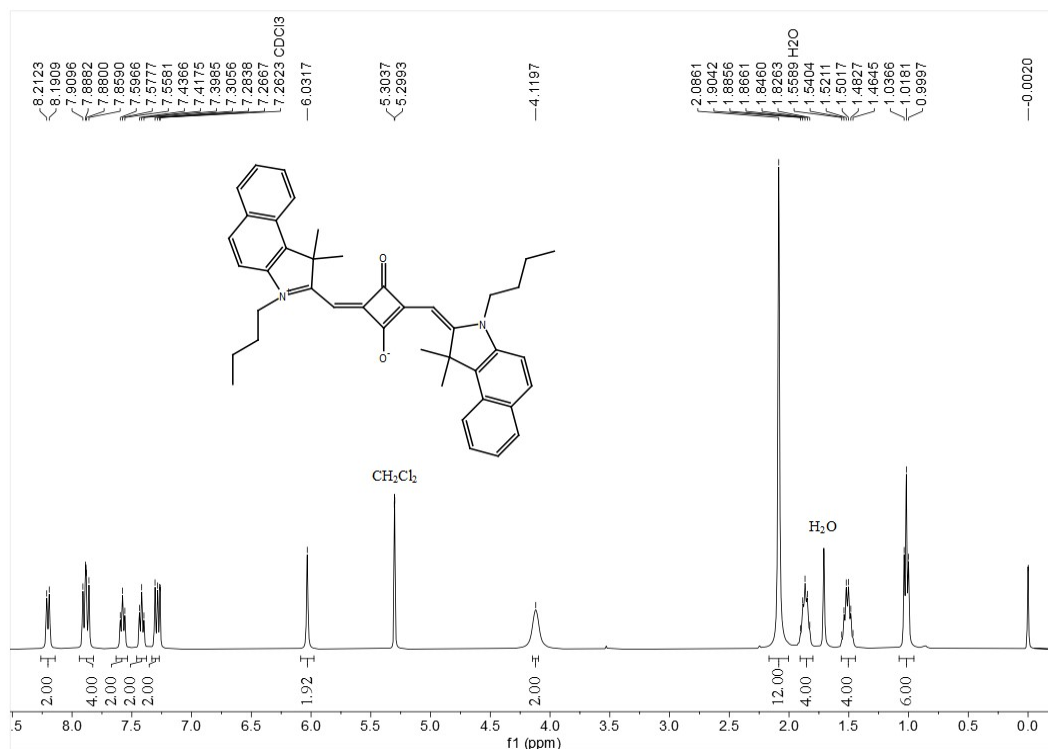

Figure S15  $^1\text{H}$  NMR spectrum (400 MHz,  $\text{CDCl}_3$ ) of BBSQ.



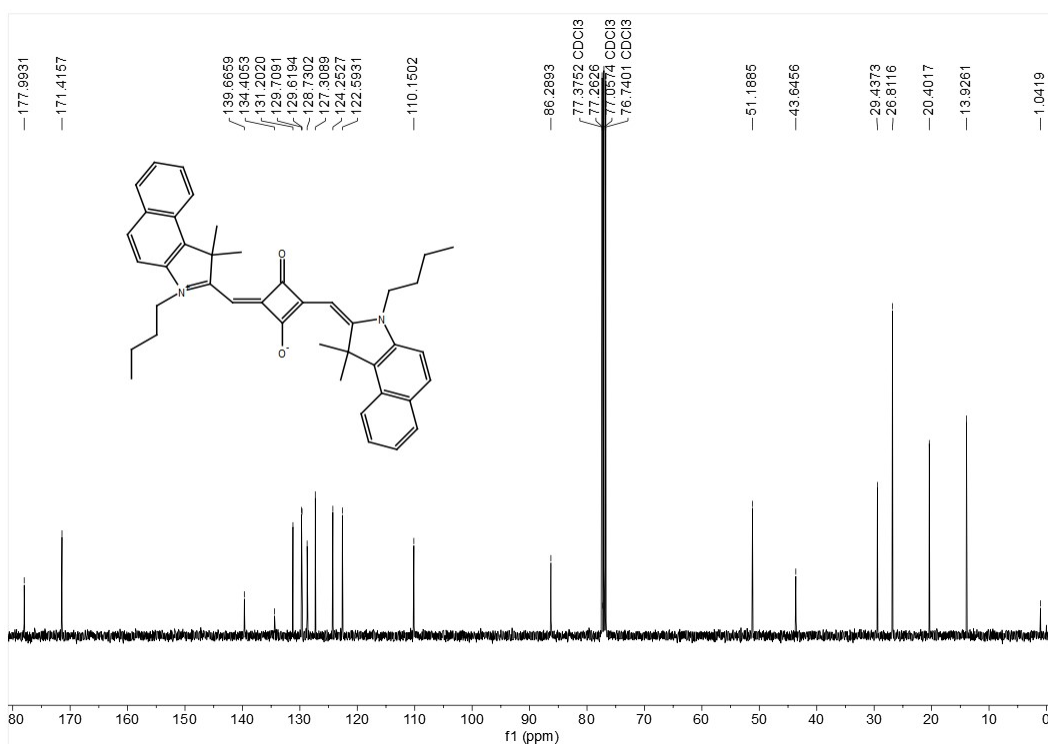

Figure S16 <sup>13</sup>C NMR spectrum (101 MHz, CDCl<sub>3</sub>) of BBSQ.

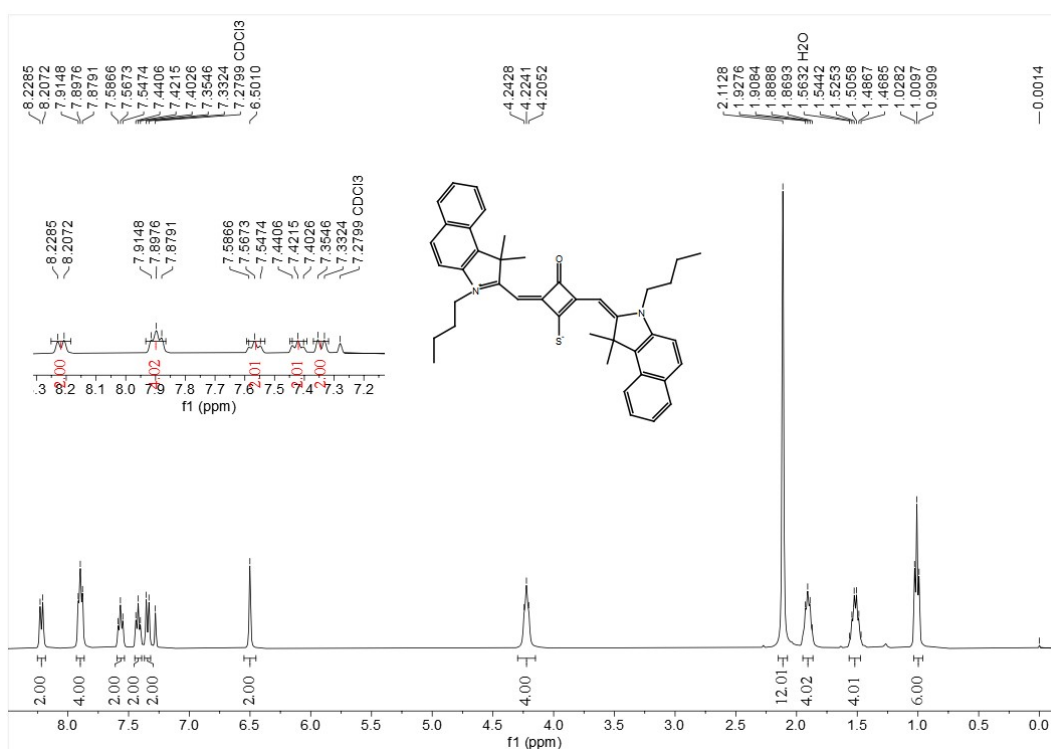

Figure S17 <sup>1</sup>H NMR spectrum (400 MHz, CDCl<sub>3</sub>) of BBSQ-S.

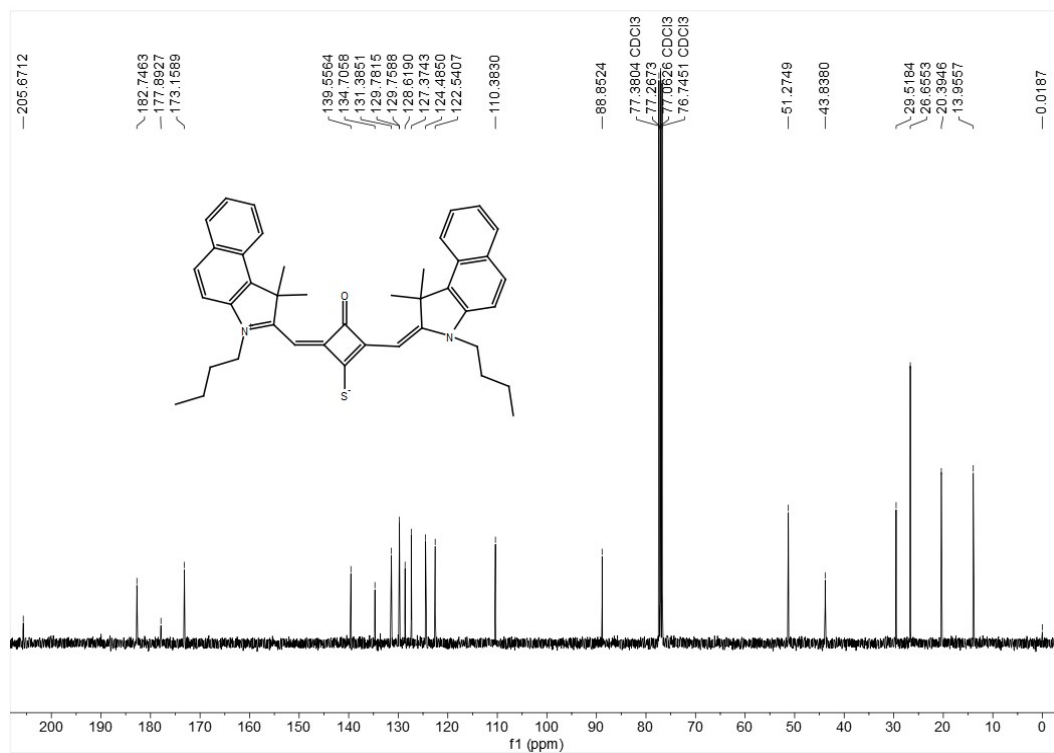

Figure S18 <sup>13</sup>C NMR spectrum (101 MHz, CDCl<sub>3</sub>) of BBSQ-S.

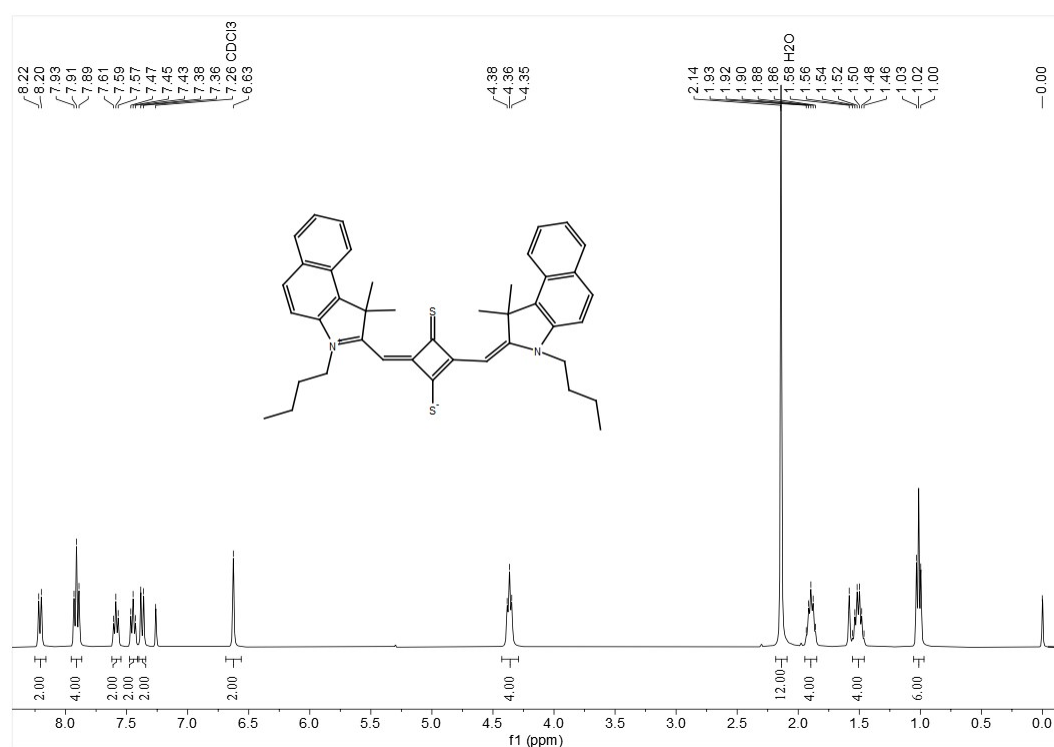

Figure S19 <sup>1</sup>H NMR spectrum (400 MHz, CDCl<sub>3</sub>) of BBSQ-S.

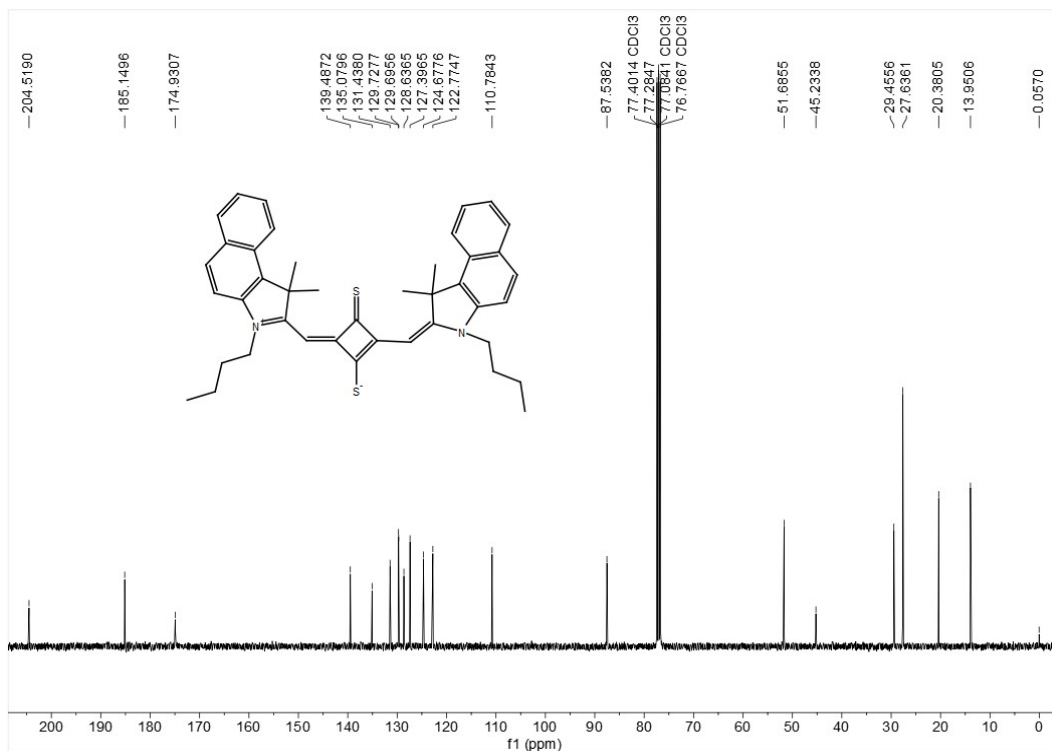

Figure S20 <sup>13</sup>C NMR spectrum (101 MHz, CDCl<sub>3</sub>) of BBSQ-SS.

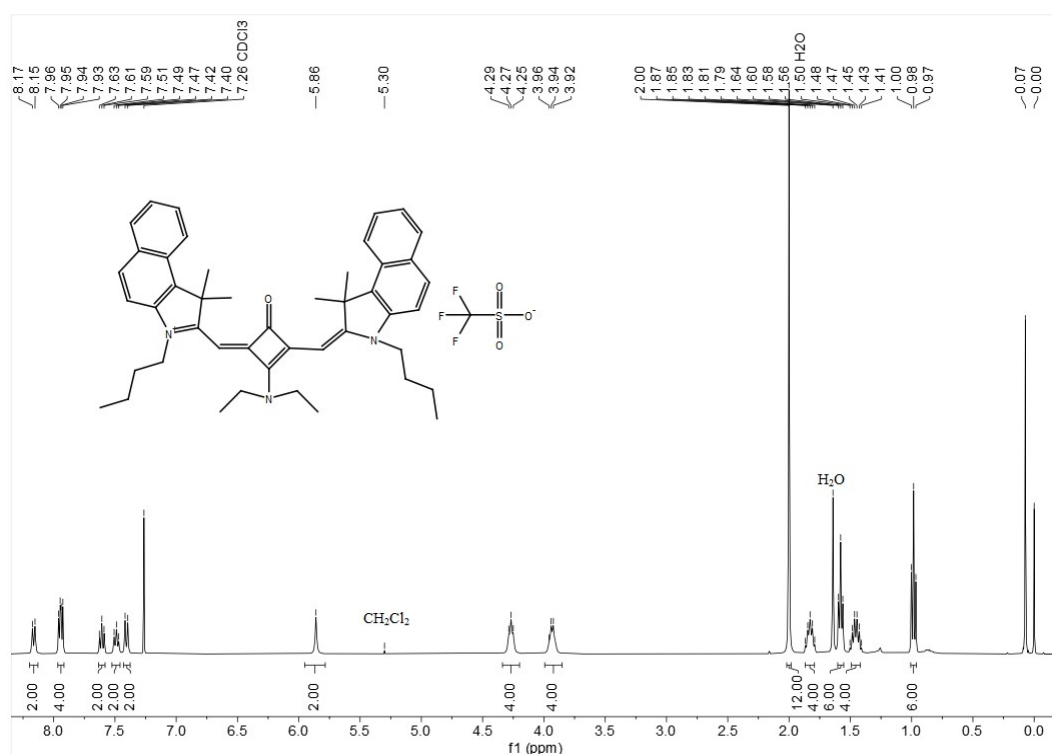

Figure S21 <sup>1</sup>H NMR spectrum (400 MHz, CDCl<sub>3</sub>) of BBSQ-NEt.

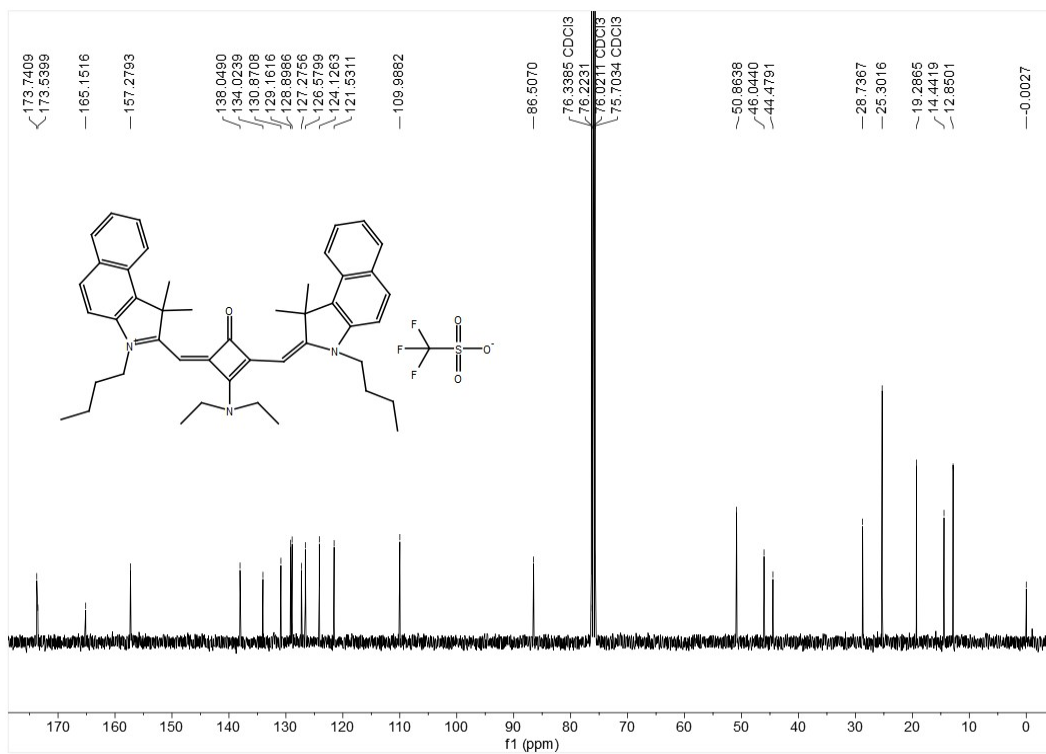

Figure S22 <sup>13</sup>C NMR spectrum (101 MHz, CDCl<sub>3</sub>) of BBSQ-NEt.

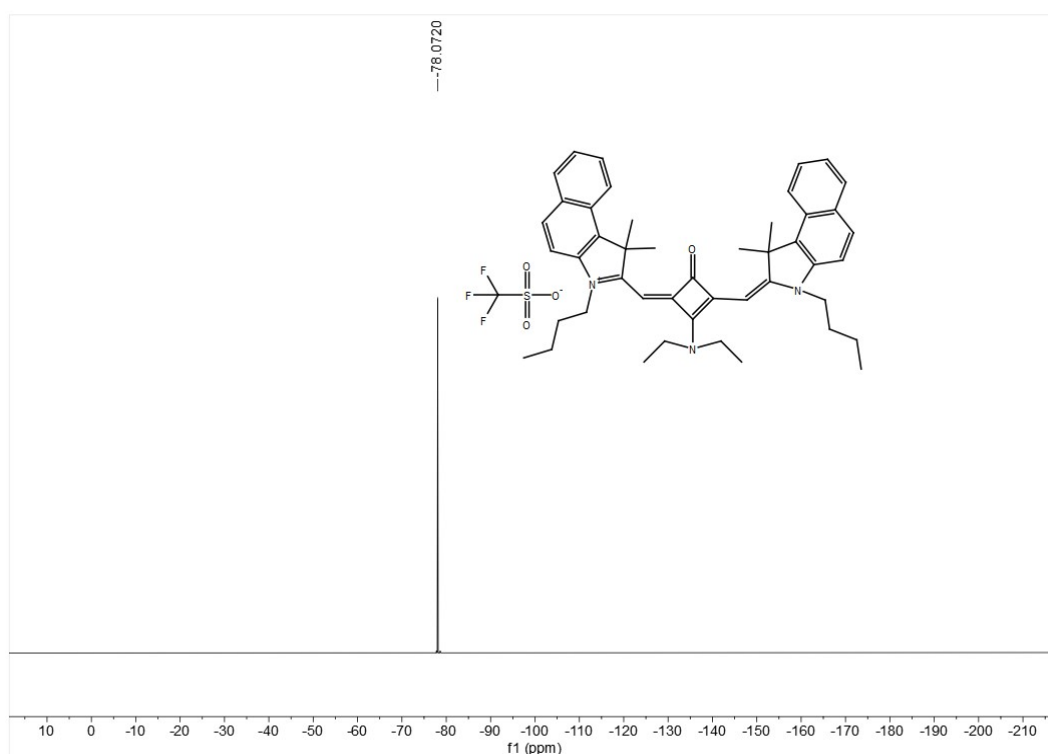

Figure S23 <sup>19</sup>F NMR spectrum (376 MHz, CDCl<sub>3</sub>) of BBSQ-NEt.

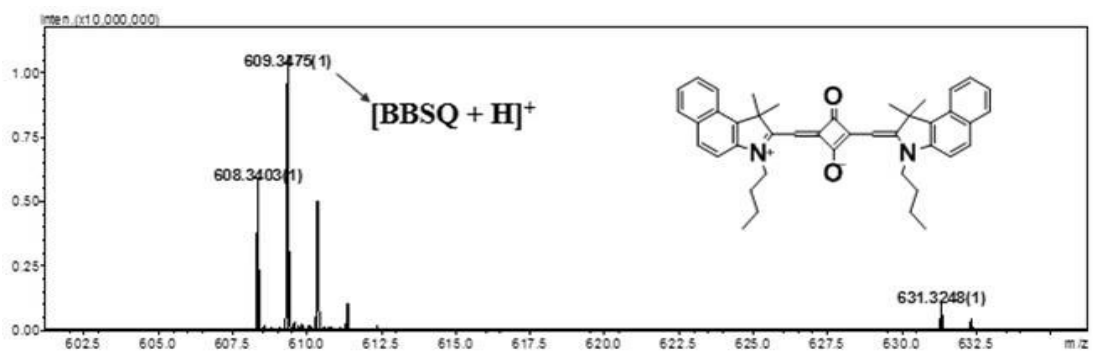

Figure S24 HRMS (ESI) of [BBSQ+H]<sup>+</sup>: 609.3475.

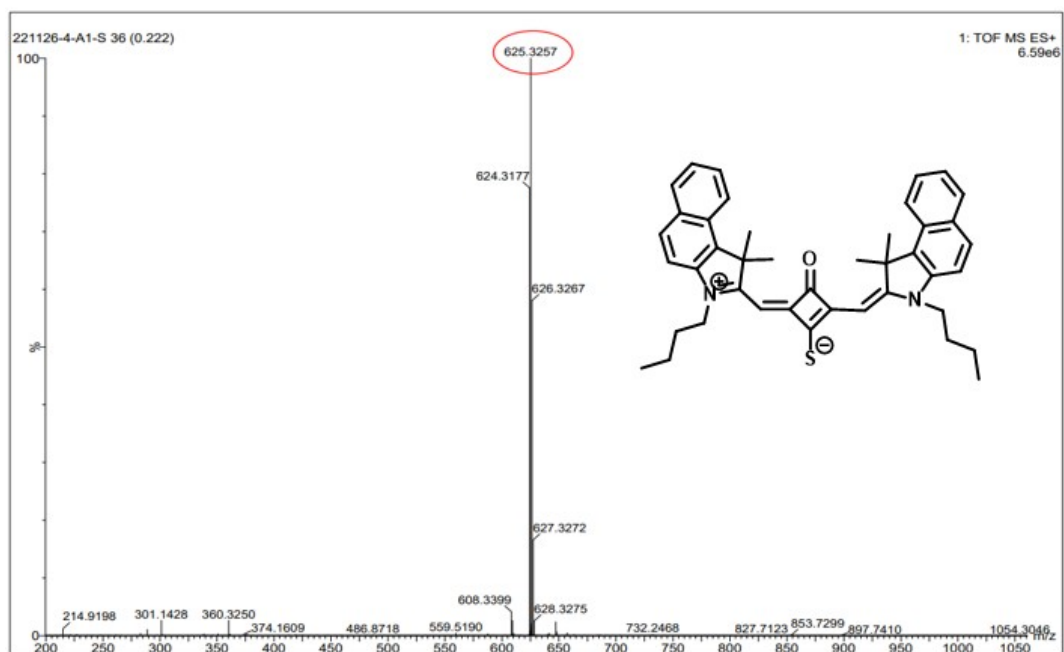

Figure S25 HRMS (ESI) of [BBSQ-S+H]<sup>+</sup>: 625.3257.

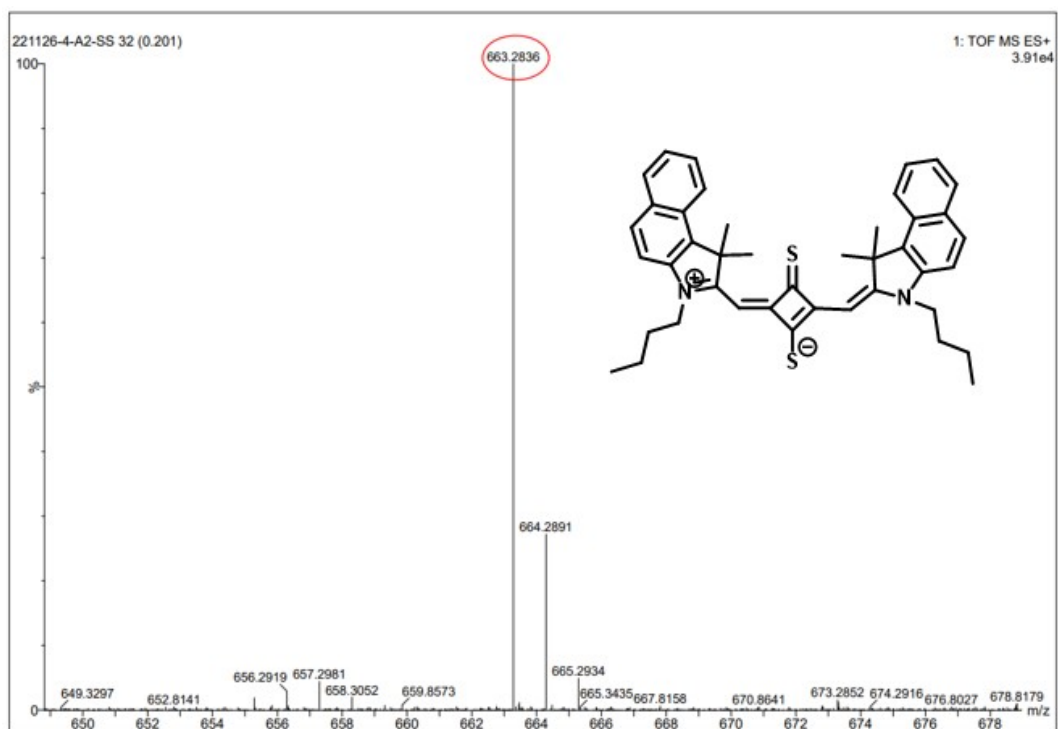

Figure S26 HRMS (ESI) of  $[BBSQ-SS+Na]^+$ : 663.2836.

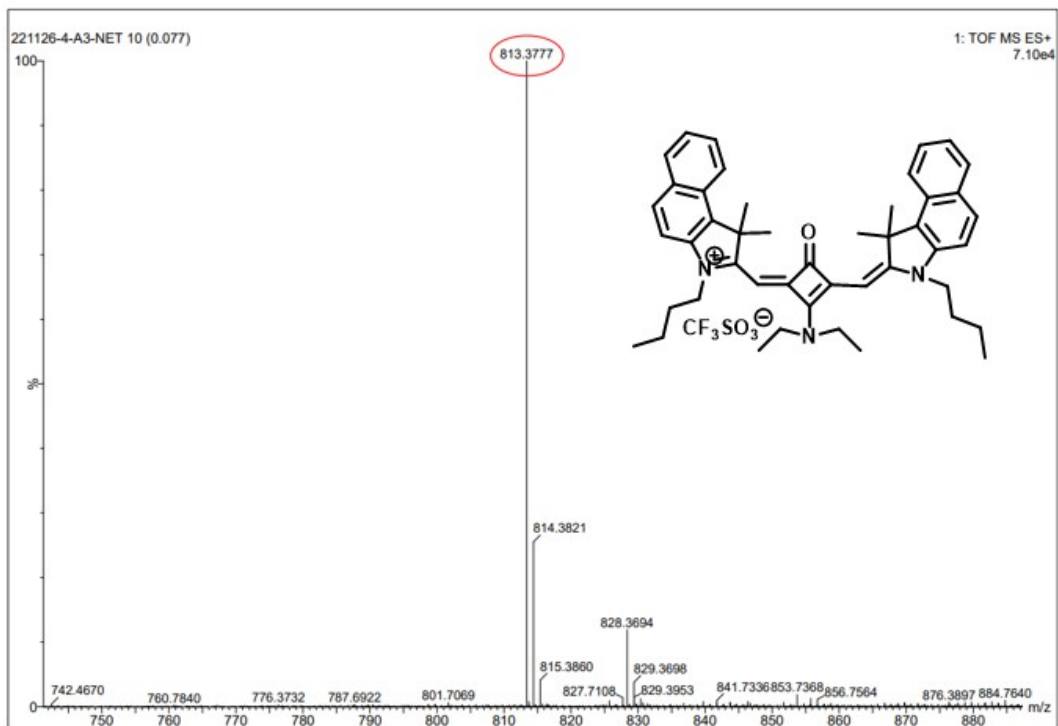

Figure S27 HRMS (ESI) of  $[BBSQ-NEt]^+$ : 813.3777.

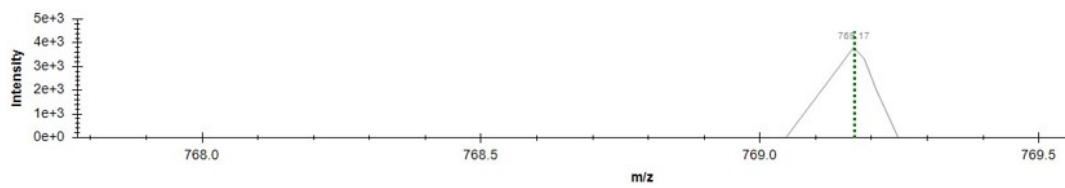

Figure S28 HRMS (ESI) of [BBSQ-FeCl<sub>3</sub><sup>+</sup>]: 769.17.

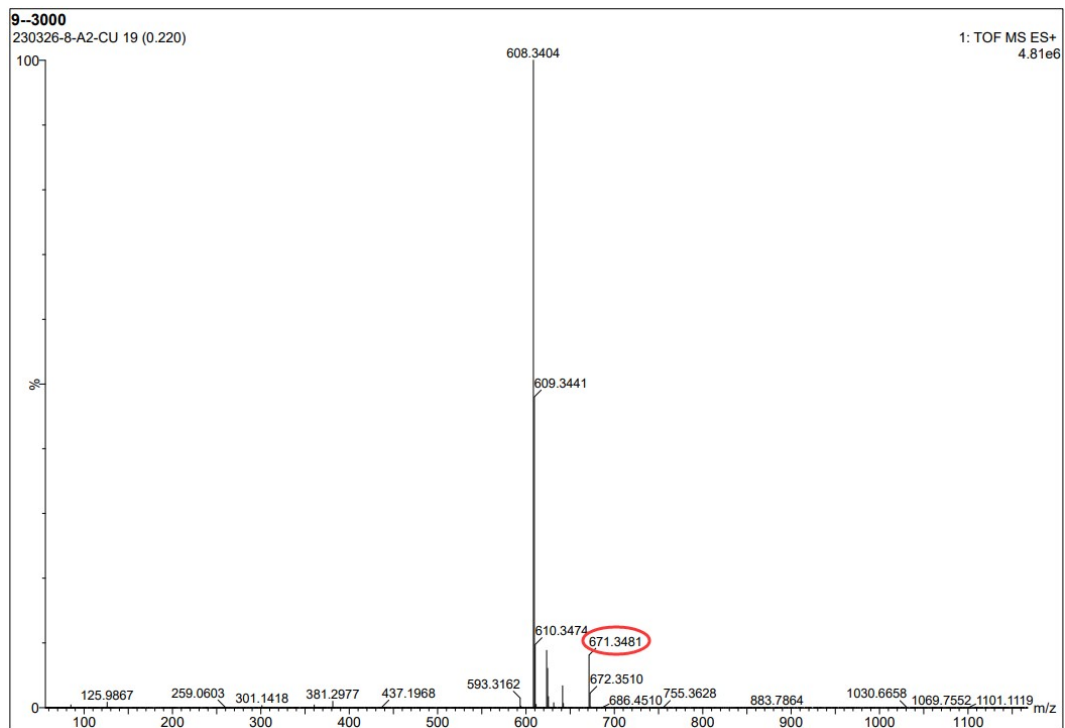

Figure S29 HRMS (ESI) of [BBSQ-Cu<sup>2+</sup>]: 671.3481.

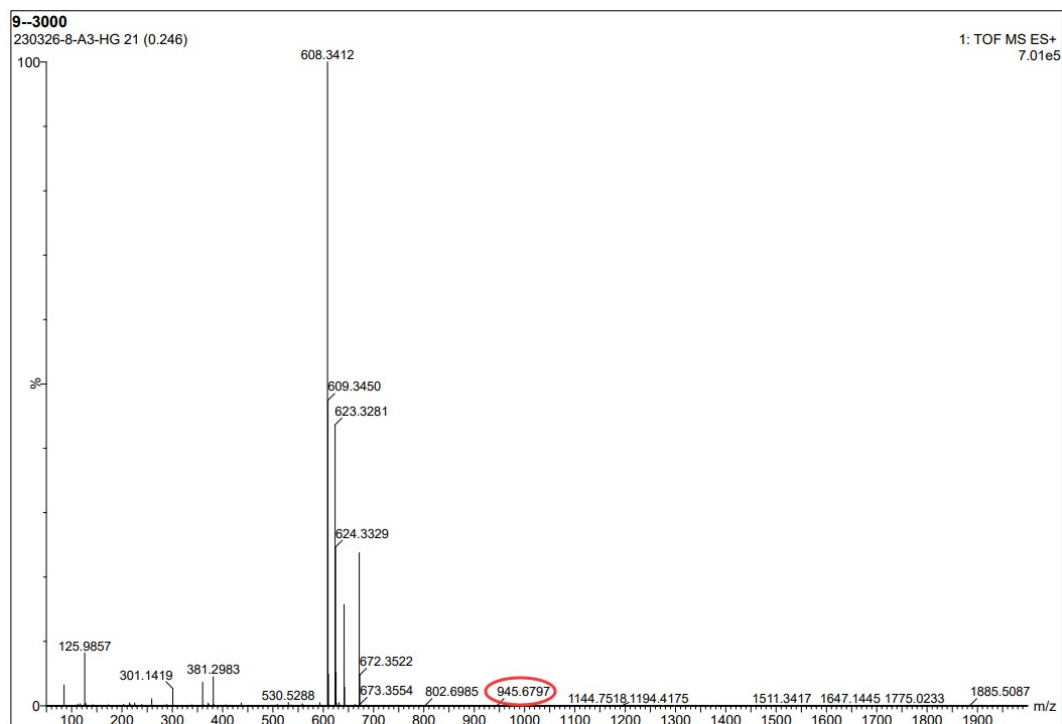

Figure S30 HRMS (ESI) of [BBSQ-Hg<sup>2+</sup>+2CH<sub>3</sub>CN+2H<sub>2</sub>O+OH<sup>-</sup>]: 945.6797.

## References

1. F. Yan, T. Zheng, D. Shi, Y. Zou, Y. Wang, M. Fu, L. Chen and W. Fu, *Sens Actuators B Chem*, 2015, **215**, 598-606.
2. H.-T. Tsai, Y. R. Bhorge, A. J. Pape, S. N. Janaki and Y.-P. Yen, *J Chin Chem Soc*, 2015, **62**, 316-320.
3. J. Liu and Y. Qian, *J Lumin*, 2017, **187**, 33-39.
4. L. Wang, H. Li and D. Cao, *Sens Actuators B Chem*, 2013, **181**, 749-755.
5. A. Singh, S. Sinha, R. Kaur, N. Kaur and N. Singh, *Sens Actuators B Chem*, 2014, **204**, 617-621.
6. Y. K. Jang, U. C. Nam, H. L. Kwon, I. H. Hwang and C. Kim, *Dyes Pigm*, 2013, **99**, 6-13.
7. H. Zhang, L. Feng, Y. Jiang, Y. T. Wong, Y. He, G. Zheng, J. He, Y. Tan, H. Sun and D. Ho, *Biosens Bioelectron*, 2017, **94**, 24-29.
8. X.-X. Hu, X.-L. Zheng, X.-X. Fan, Y.-T. Su, X.-Q. Zhan and H. Zheng, *Sens Actuators B Chem*, 2016, **227**, 191-197.
9. R. An, D. Zhang, Y. Chen and Y.-z. Cui, *Sens. Actuators B Chem*, 2016, **222**, 48-54.
10. M. Yang, H. Wang, J. Huang, M. Fang, B. Mei, H. Zhou, J. Wu and Y. Tian, *Sens Actuators B Chem*, 2014, **204**, 710-715.



- 
11. Y. Liu, E.-B. Yang, R. Han, D. Zhang, Y. Ye and Y.-F. Zhao, *Chin Chem Lett*, 2014, **25**, 1065-1068.
  12. Y. Gao, C. Zhang, S. Peng and H. Chen, *Sens. Actuators B Chem*, 2017, **238**, 455-461.
  13. M. Ozdemir, *Sens. Actuators B Chem*, 2017, **249**, 217-228.
  14. Y. Wang, F. Pan, Y. Zhang, F. Peng, Z. Huang, W. Zhang and W. Zhao, *Analyst*, 2016, **141**, 4789-4795.
